# Supplementary material for: Neonatal loss of FGFR2 in astroglial cells affects locomotion, sociability, working memory, and glia-neuron interactions in mice
Source: PubMed Central journal article supplement (PMC10008554; doi:10.1038/s41398-023-02372-y), 2023-03-11
Supplement: 41398_2023_2372_MOESM1_ESM.pdf [file 41398_2023_2372_MOESM1_ESM.pdf]

# Supplemental Fig 1

Additional Controls: **A,B**. Comparison of neonatal vehicle/oil injected FGFR2 Cre- and Cre+ control mice with neonatal tamoxifen injected FGFR2 Cre- and nKO Cre+ mice on two key behavioral tasks for which there were differences for Tam-induced FGFR2 nKO.

**A**. Increased activity in open field of Tam-injected Cre+ animals compared to Oil-injected Cre+ animals (rmANOVA  $n=3$  oil inj Cre+ vs  $n=10$  tam inj Cre+, rmANOVA:  $F(1, 11) = 4.574$ ,  $p=0.056$ ). Neonatal Tam Inj FGFR2 Cre- mice ( $n=10$ ) and Neonatal Oil Inj Cre+ mice ( $n=5$ ) included for demonstration of similarity to Neonatal Oil Inj FGFR2 Cre+ mice.

**B**. Time Ratio in Zones of Elevated Plus Maze. Difference of Cre- and Cre+ Tam Inj mice ( $n=10,10$ ) shown for comparison to no difference in Cre- and Cre+ Oil Inj mice ( $n=3,5$ ). (NS= No significant difference or trend)

**C**. Comparison of adult vehicle/oil injected FGFR2 Cre- and Cre+ control mice with adult tamoxifen injected FGFR2 Cre- and iKO Cre+ mice on the only behavioral task for which there was a difference for Tam-induced FGFR2 iKO. Time Ratio in Zones of the Elevated Plus Maze. Difference of Cre- and Cre+ Tam Inj mice ( $n=7,10$ ) shown for comparison to no difference in Cre- and Cre+ Oil Inj mice ( $n=3,4$ ) (NS= No significant difference or trend)

## Open Field Total Distance

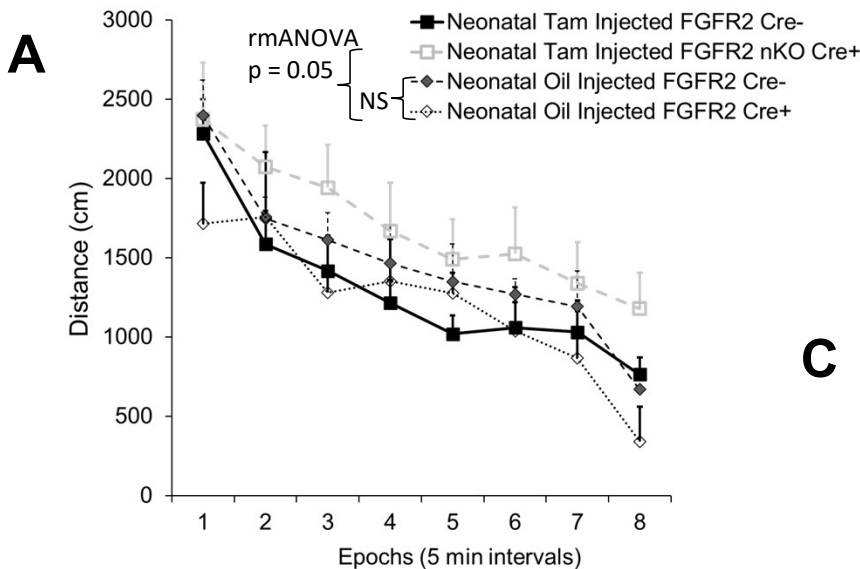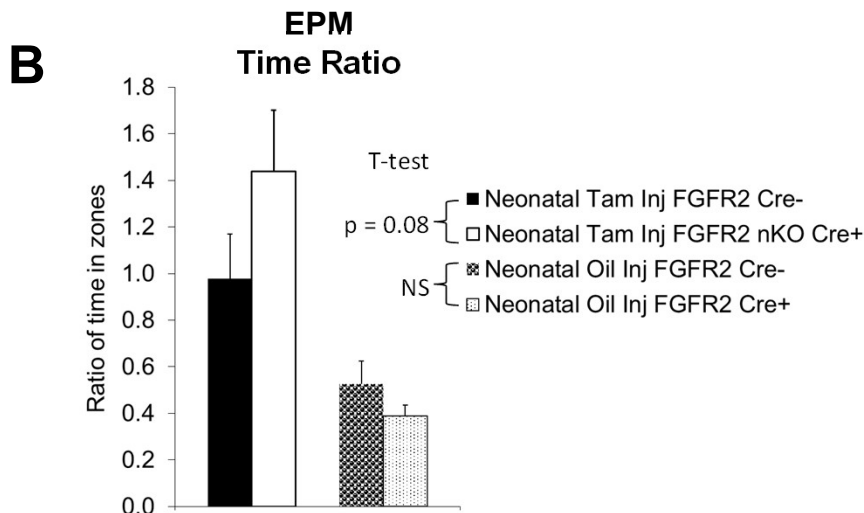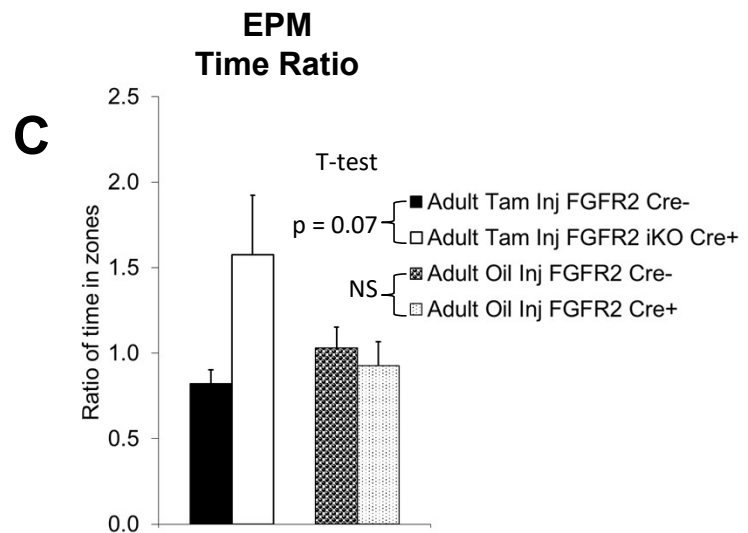

# Supplemental Fig 2

Comparison of neonatal tamoxifen injected FGFR2 Cre- controls with adult tamoxifen injected FGFR2 Cre- controls (n=9 neonatal tam vs n=6 adult tam). A: No difference in Open Field Activity (rmANOVA: F (1, 130) = 1.034, p=0.311); B: No difference in Y-maze Spontaneous Alternation (p=0.38); C: No difference in Social Preference (two-way ANOVA interaction: F (1, 26) = 1.726, p=0.2004); D: Increased time in Open Arms of Elevated Plus Maze in adult tamoxifen injected FGFR2 Cre- Controls (p=0.012).

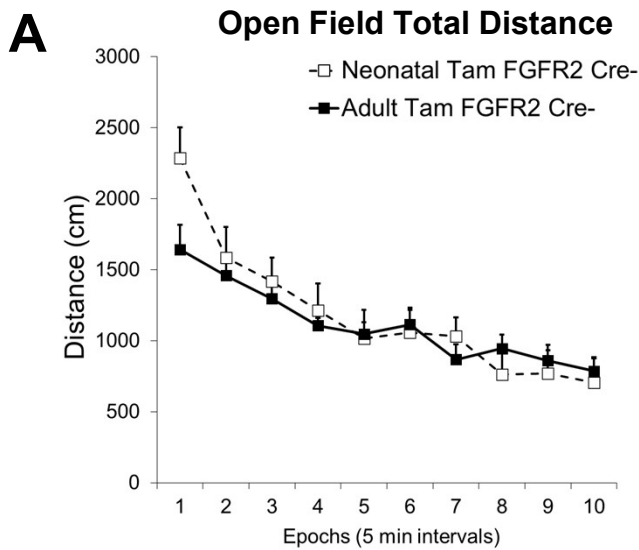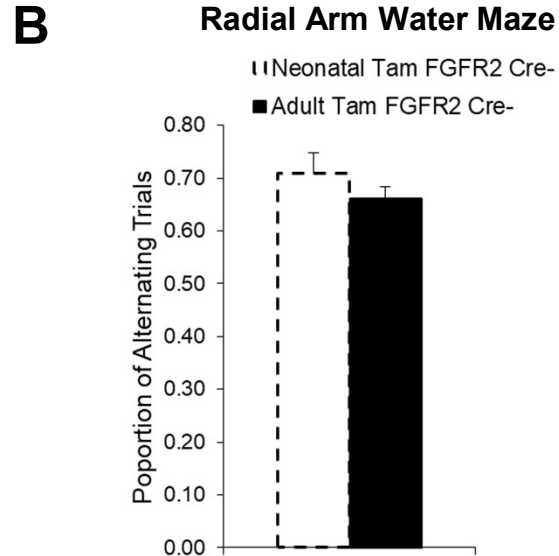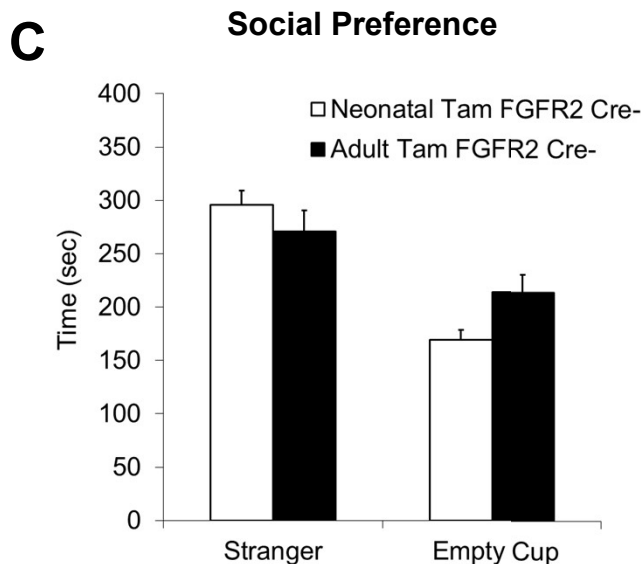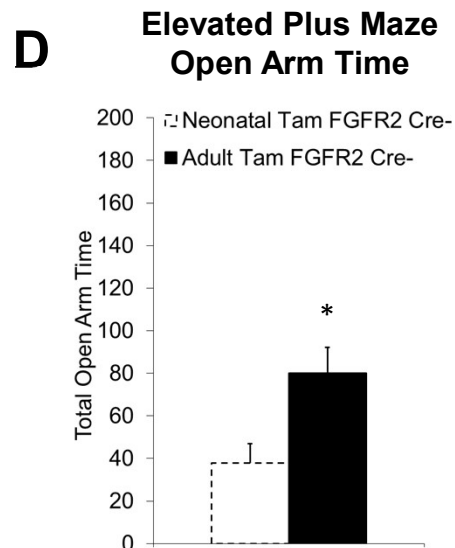

# Supplemental Fig 3

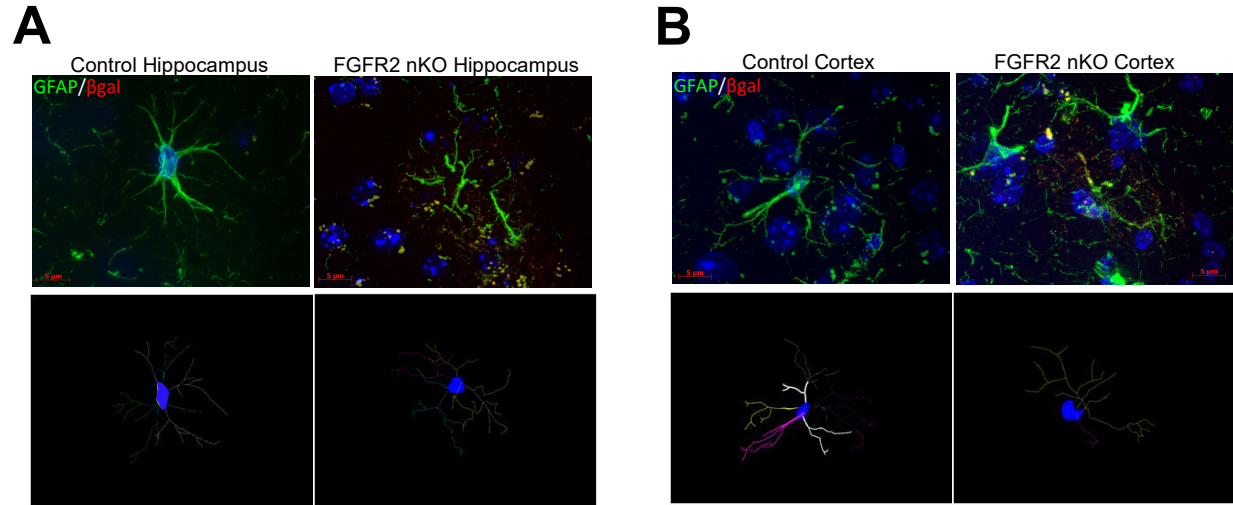

Visualization of overall normal astrocyte structure in control and FGFR2 nKO mice

Supplemental Table 1. Quantification of FGFR2 knock out with neonatal tamoxifen induction of *hGFAP-CreER<sup>T2</sup>*

|                                       | <b>Control<br/><i>Fgfr2</i> Gene<br/>Expression<br/>Mean ± SEM</b> | <b>FGFR2 nKO <i>Fgfr2</i><br/>Gene Expression<br/>Mean ± SEM</b> | <b>Difference</b> | <b>P value<br/>Difference</b> |
|---------------------------------------|--------------------------------------------------------------------|------------------------------------------------------------------|-------------------|-------------------------------|
| <b>Juvenile<br/>Cortex</b>            | 1.00 ±0.07<br>(n=8)                                                | 0.71 ± 0.07 (n=6)                                                | ↓29%              | 0.08 <sup>‡</sup>             |
| <b>Juvenile<br/>Hippocampus</b>       | 1.00 ±0.08<br>(n=8)                                                | 0.61 ± 0.04<br>(n=6)                                             | ↓39%              | 0.03*                         |
| <b>Adult<br/>Anterior Cortex</b>      | 0.87 ±0.10<br>(n=3)                                                | 0.49 ± 0.04 (n=3)                                                | ↓43%              | 0.03*                         |
| <b>Adult<br/>Posterior<br/>Cortex</b> | 1.21 ±0.11<br>(n=3)                                                | 0.69 ± 0. (n=3)                                                  | ↓43%              | 0.01*                         |
| <b>Adult<br/>Hippocampus</b>          | 0.74 ±0.14<br>(n=3)                                                | 0.5 ±0.07 (n=3)                                                  | ↓33%              | 0.18                          |

\* significance  $p < 0.05$ ; ‡-trending significance,  $0.05 \leq p < 0.15$
